# Supplementary material for: Mechanical stress caused by wind on leaves of Theobroma cacao: Photosynthetic, molecular, antioxidative and ultrastructural responses
Source: PLoS One. 2018 Jun 27;13(6):e0198274. doi: 10.1371/journal.pone.0198274 (PMC6021058; doi:10.1371/journal.pone.0198274)
Supplement: S3 Table — Instant water use efficiency (WUE) on leaves of CCN 51 cloned plants of T. cacao exposed to intermittent and constant winds with different speeds [2.5 (S1), 3.5 (S2) and 4.5 (S3) m s-1] and exposure times [0 (C), 3 (T1), 6 (T2) and 12 (T3) h). (XLSX) [file pone.0198274.s003.xlsx]

## Sheet: S3 Table
S3 Table . Instant water use efficiency (WUE) on leaves of CCN 51 cloned plants of T. cacao exposed to
	intermittent and constant winds with different speeds [2.5 (S1), 3.5 (S2) and 4.5 (S3) m s-1]
	and exposure times [0 (C), 3 (T1), 6 (T2) and 12 (T3) h).
				A/gs
			2.5	3.5	4.5
	IW	0 h	50.6565	51.8136	54.5729
		3 h	60.5693	52.993	70.2996
		6 h	61.5201	61.3313	67.2708
		12 h	62.5425	73.3632	57.336
	CW	0 h	74.1228	71.7555	71.2892
		3 h	85.7119	98.6308	89.9373
		6 h	70.2812	78.6342	84.6964
		12 h	92.9003	83.7842	81.724
