# Supplementary material for: Mechanical stress caused by wind on leaves of Theobroma cacao: Photosynthetic, molecular, antioxidative and ultrastructural responses
Source: PLoS One. 2018 Jun 27;13(6):e0198274. doi: 10.1371/journal.pone.0198274 (PMC6021058; doi:10.1371/journal.pone.0198274)
Supplement: S4 Table — Concentration of thiobarbituric acid-reactive substances (TBARS) in leaves of CCN 51 cloned genotype of T. cacao exposed to intermittent (IW) and constant (CW) wind with different speeds (2.5, 3.5 and 4.5 m s-1) and exposure times (0, 3, 6 and 12 h). (XLSX) [file pone.0198274.s004.xlsx]

## Sheet: S4 Table
S4 Table. Concentration of thiobarbituric acid-reactive substances (TBARS) in leaves of CCN 51 cloned genotype of T. cacao
	exposed to intermittent (IW) and constant (CW) wind with different speeds (2.5, 3.5 and 4.5 m s-1) and exposure times (0, 3, 6 and 12 h).
	A) Mature leaf - IW					B) Young leaf - IW
		2.5	3.5	4.5			2.5	3.5	4.5
	0 h	46.0161	46.0161	46.0161		0 h	49.9677	49.9677	49.9677
	3 h	72.4839	64.2258	51.3387		3 h	53.0323	59.9677	85.5
	6 h	98.7056	279.694	74.8065		6 h	49.1613	189.202	54.1129
	12 h	49.8065	73.0484	119.5		12 h	63.4839	45.0323	46.0968
	C) Mature leaf - CW					D) Young leaf - CW
		2.5	3.5	4.5			2.5	3.5	4.5
	0 h	49.9677	49.9677	49.9677		0 h	46.0161	49.9677	49.9677
	3 h	22.6935	30.1452	78.1452		3 h	48.2581	68.5323	65.8145
	6 h	60.6613	96.4677	61.2742		6 h	33.6452	75.4516	86.8387
	12 h	21.4355	55.871	137.29		12 h	40.4194	69.1935	69.6935
